# Supplementary material for: Photoactive bile salts with critical micellar concentration in the micromolar range
Source: Royal Society of Chemistry journal article supplement (doi:10.1039/c6cp00813e), 2016-01-01
Supplement: c6cp00813e1.pdf [file c6cp00813e1.pdf]

## **Electronic Supplementary Information**

# Photoactive Bile Salts with Critical Micellar Concentration in the Micromolar Range

*Miguel Gomez-Mendoza, M. Luisa Marin\* and Miguel A. Miranda\**

*Instituto Universitario Mixto de Tecnología Química (UPV-CSIC), Universitat Politècnica de  
València, Avenida de los Naranjos s/n, 46022 Valencia, Spain.*

### **Table of contents**

|              |       |
|--------------|-------|
| 1. Figure S1 | S2    |
| 2. Figure S2 | S2    |
| 3. Figure S3 | S3    |
| 4. Figure S4 | S4    |
| 5. Table S1  | S5    |
| 6. Figure S5 | S6-S7 |
| 7. Table S2  | S8    |
| 8. Figure S6 | S9    |
| 9. Figure S7 | S10   |

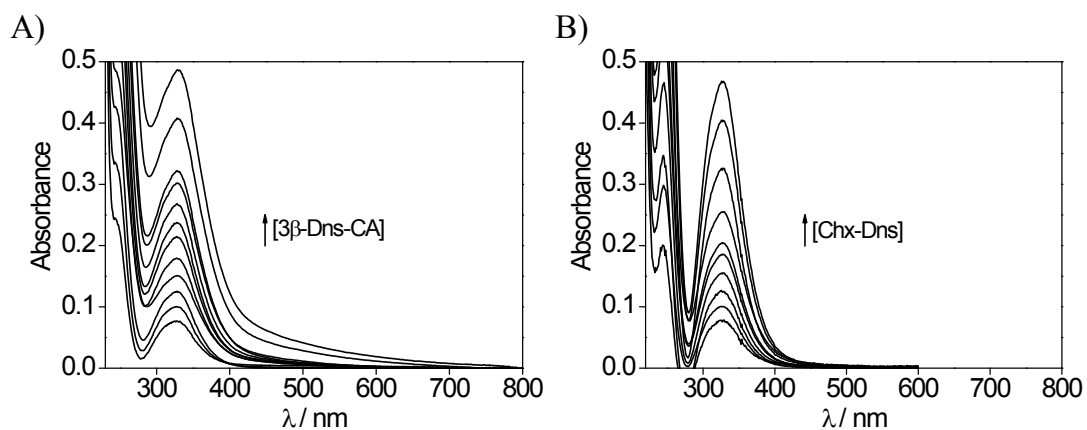

**Figure S1.** Absorption spectra of A) 3 $\beta$ -Dns-CA or B) Chx-Dns in aqueous solution upon increasing concentrations (25 – 140  $\mu$ M).

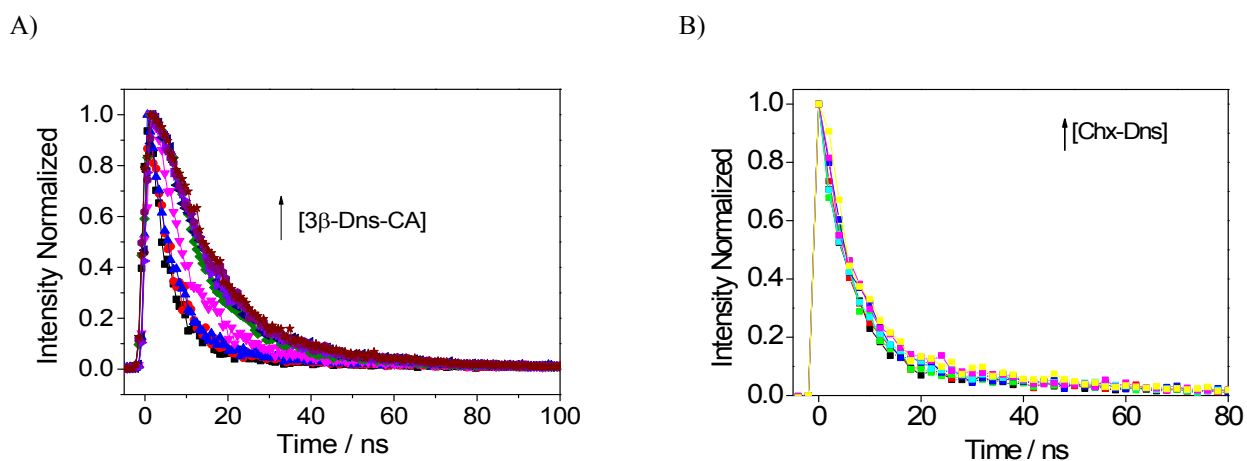

**Figure S2.** Time-Resolved fluorescence emission intensity *versus* time ( $\lambda_{exc} = 375$  nm) for 3 $\beta$ -Dns-CA (A) or Chx-Dns (B).

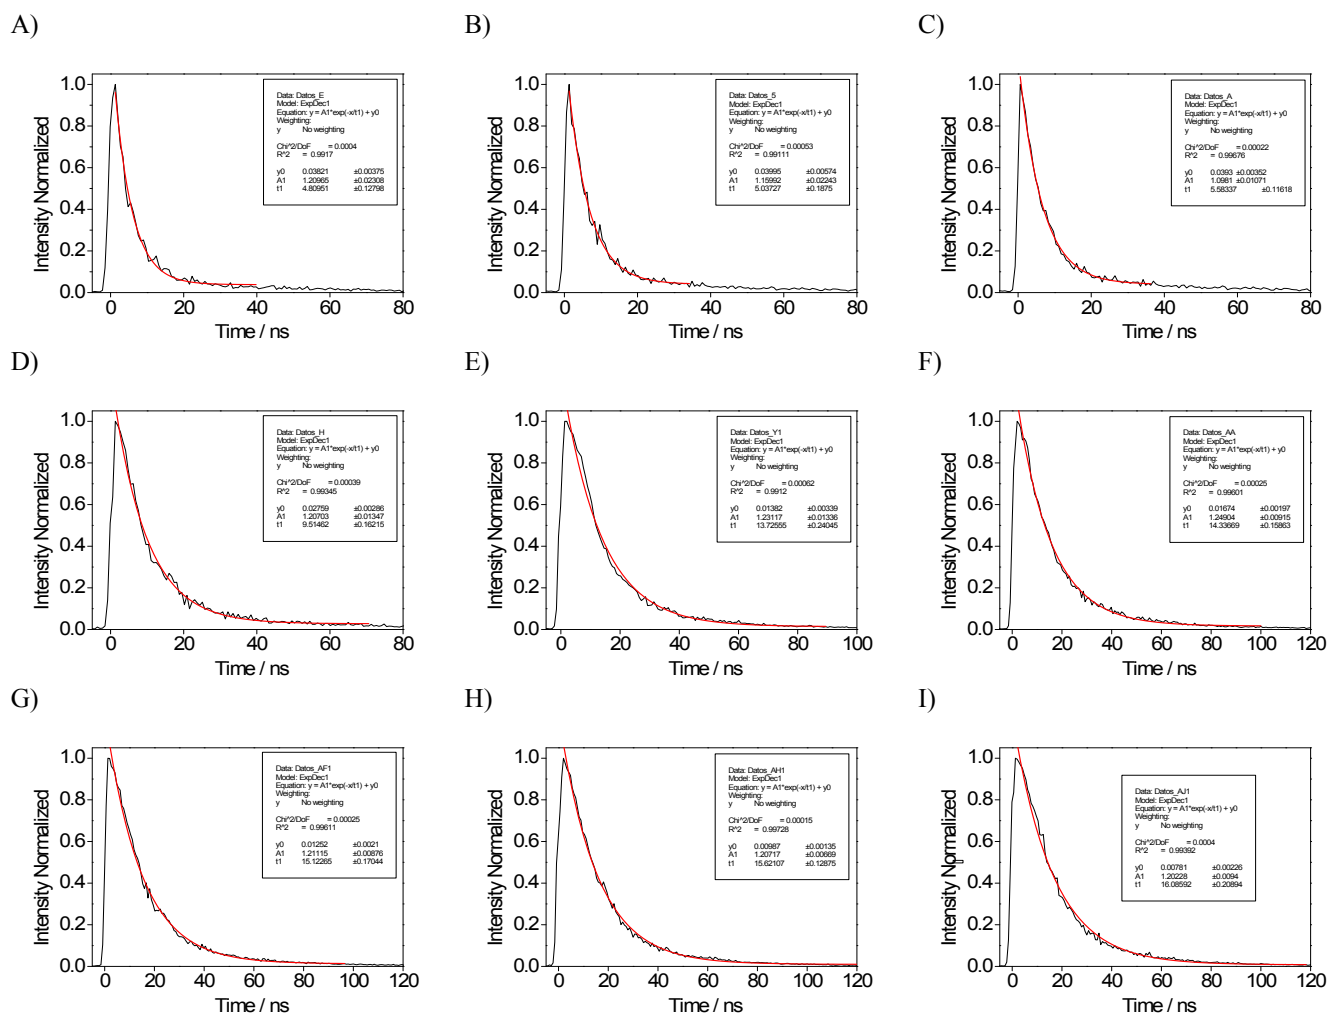

**Figure S3.** Decay curves for 3β-Dns-CA in aqueous solution obtained upon increasing concentrations together with the corresponding monoexponential fitting (red): 25 (A), 33 (B), 40 (C), 50 (D), 68 (E), 82 (F), 100 (G), 120 (H) and 140 μM (I).

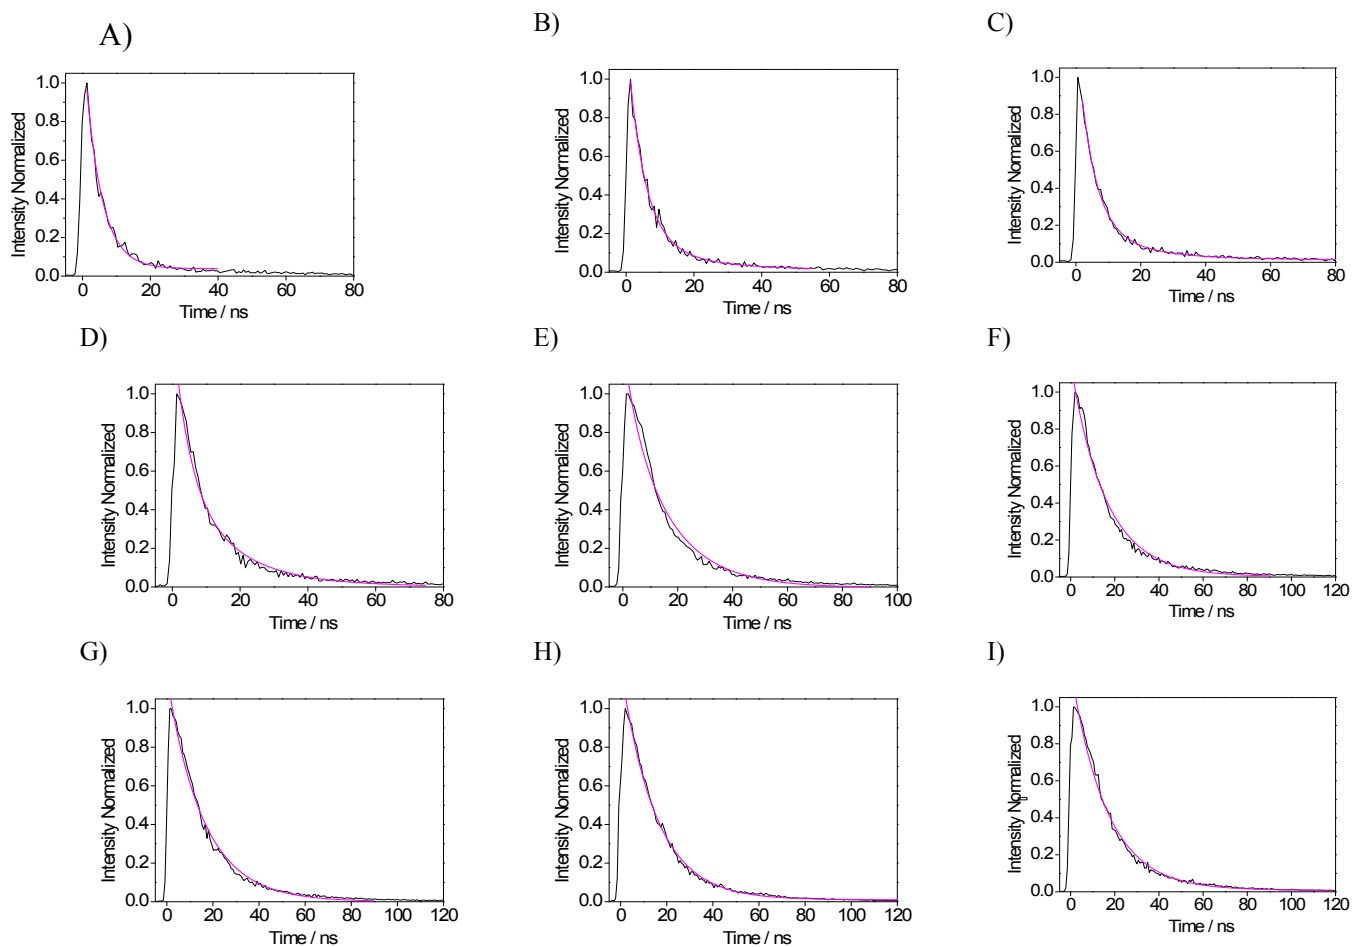

**Figure S4.** Decay curves for 3 $\beta$ -Dns-CA in aqueous solution obtained upon increasing concentrations together with the corresponding two-exponential fitting (pink): 25 (A), 33 (B), 40 (C), 50 (D), 68 (E), 82 (F), 100 (G), 120 (H) and 140  $\mu$ M (I).

**Table S1.** Fluorescence lifetimes of Chx-Dns and 3 $\beta$ -Dns-CA upon increasing concentration (25-140  $\mu$ M).

| [Dns derivative] / $\mu$ M | <i>Mono-exponential fitting</i> |                        |                |                                   |                        |                | <i>Two-exponential fitting</i>    |                        |                            |                        |                |
|----------------------------|---------------------------------|------------------------|----------------|-----------------------------------|------------------------|----------------|-----------------------------------|------------------------|----------------------------|------------------------|----------------|
|                            | <i>Chx-Dns</i>                  |                        |                | <i>3<math>\beta</math>-Dns-CA</i> |                        |                | <i>3<math>\beta</math>-Dns-CA</i> |                        |                            |                        |                |
|                            | $\tau$ / ns                     | Pre-exponential factor | R <sup>2</sup> | $\tau$ / ns                       | Pre-exponential factor | R <sup>2</sup> | $\tau_S$ / ns <sup>a</sup>        | Pre-exponential factor | $\tau_A$ / ns <sup>b</sup> | Pre-exponential factor | R <sup>2</sup> |
| 25                         | 6.2                             | 0.9380                 | 0.9974         | 4.8                               | 1.2096                 | 0.9917         | 4.8                               | 1.1570                 | 16.0                       | 0.0046                 | 0.9920         |
| 33                         | --                              | --                     | --             | 5.3                               | 1.1599                 | 0.9911         | 4.8                               | 1.0413                 | 16.0                       | 0.1038                 | 0.9923         |
| 40                         | 6.5                             | 0.9373                 | 0.9983         | 5.6                               | 1.0982                 | 0.9967         | 4.8                               | 1.0227                 | 16.0                       | 0.2134                 | 0.9962         |
| 50                         | 6.4                             | 0.9120                 | 0.9971         | 9.5                               | 1.2070                 | 0.9934         | 4.8                               | 0.7592                 | 16.0                       | 0.5915                 | 0.9883         |
| 68                         | --                              | --                     | --             | 13.7                              | 1.2321                 | 0.9912         | 4.8                               | 0.2277                 | 16.0                       | 1.0337                 | 0.9863         |
| 82                         | 6.7                             | 0.9279                 | 0.9926         | 14.3                              | 1.2480                 | 0.9960         | 4.8                               | 0.0546                 | 16.0                       | 1.1299                 | 0.9884         |
| 100                        | 7.0                             | 0.9553                 | 0.9906         | 15.1                              | 1.2111                 | 0.9962         | 4.8                               | 0.0038                 | 16.0                       | 1.1362                 | 0.9936         |
| 120                        | 7.3                             | 0.9385                 | 0.9954         | 15.6                              | 1.2072                 | 0.9973         | 4.8                               | 0.0025                 | 16.0                       | 1.3480                 | 0.9930         |
| 140                        | 7.2                             | 0.9882                 | 0.9882         | 16.1                              | 1.2010                 | 0.9932         | 4.8                               | -0.005                 | 16.0                       | 1.4222                 | 0.9946         |

<sup>a</sup>  $\tau_S$  correspond to the value obtained for solution. <sup>b</sup>  $\tau_A$  correspond to the value obtained for photoactive assemblies .

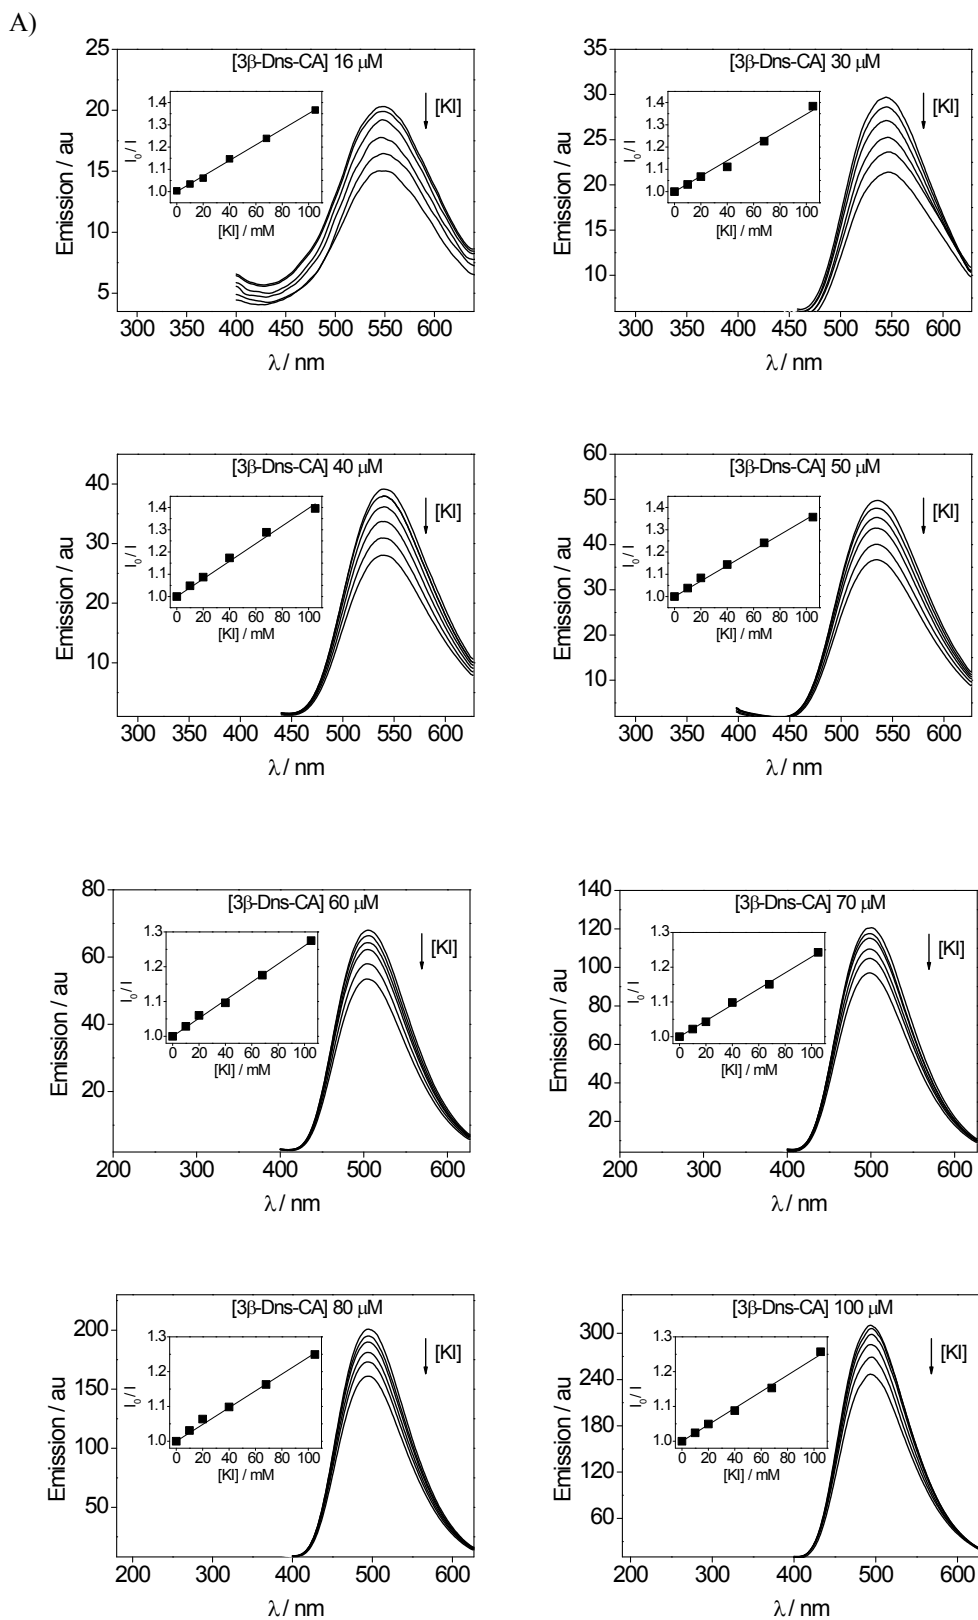

**Figure S5.** Changes in the emission spectra ( $\lambda_{\text{exc}} = 330$  nm) of A) 3 $\beta$ -Dns-CA and B) 3 $\beta$ -NPX-CA, upon addition of increasing concentrations of KI recorded in 0.2 M aqueous solution at different concentrations, ranging from 16  $\mu$ M to 100  $\mu$ M. Insets: corresponding Stern-Volmer plots.

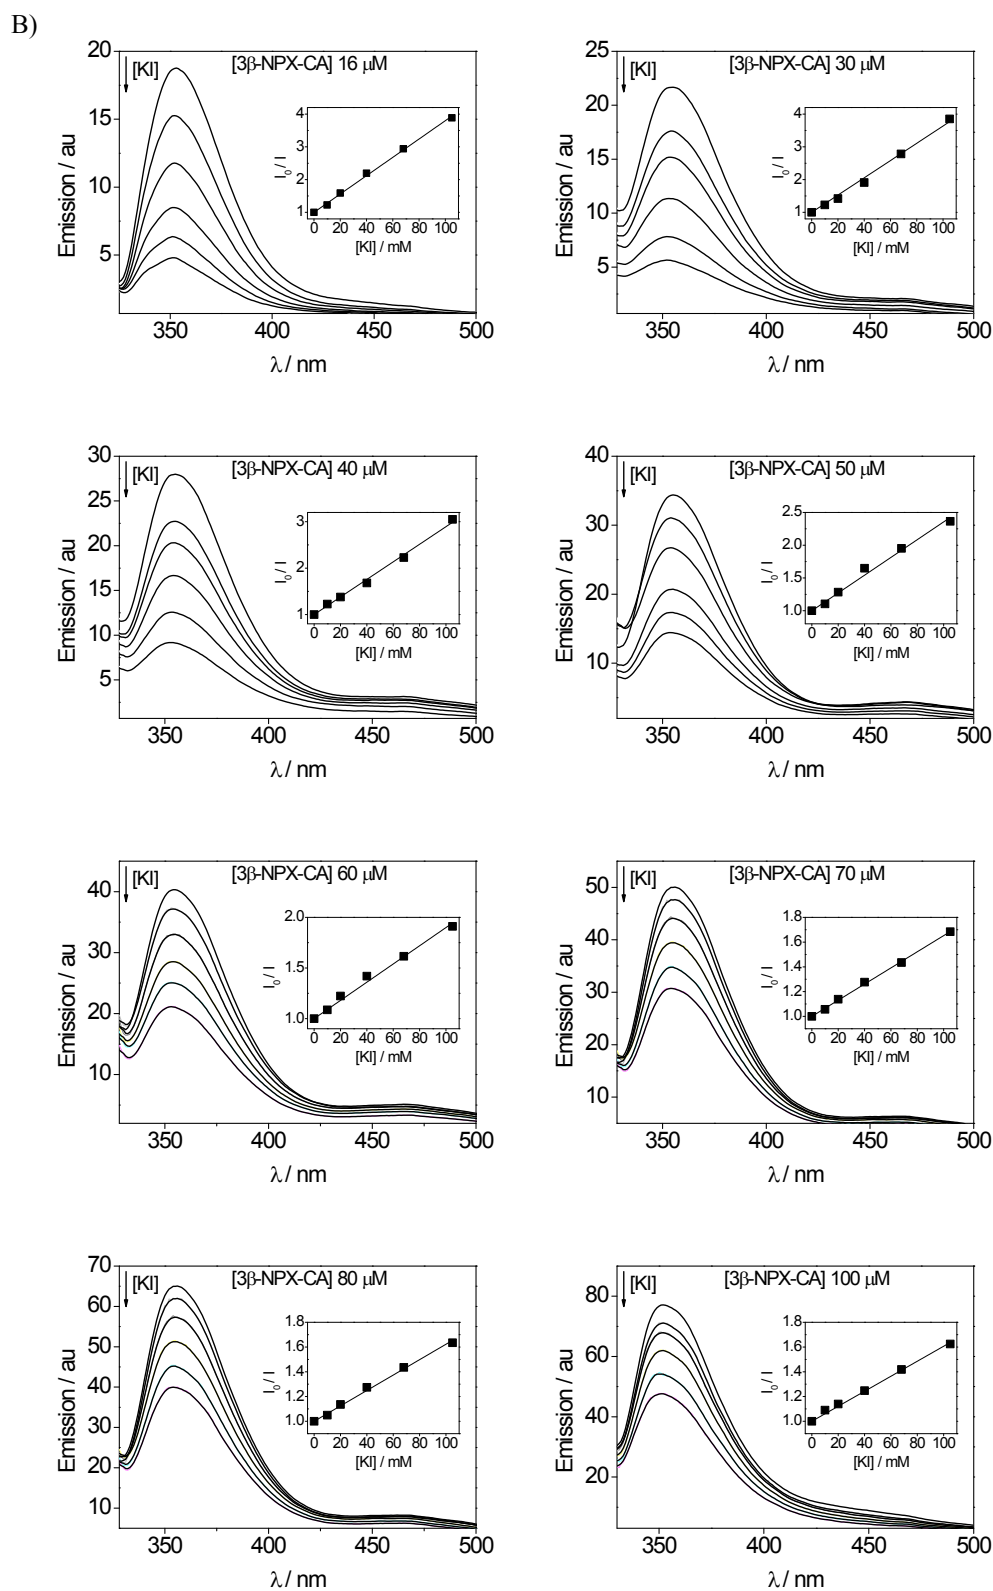

**Figure S5. (Cont.)** Changes in the emission spectra (λ<sub>exc</sub> = 330 nm) of A) 3β-Dns-CA and B) 3β-NPX-CA, upon addition of increasing concentrations of KI recorded in 0.2 M aqueous solution at different concentrations, ranging from 16 μM to 100 μM. Insets: corresponding Stern-Volmer plots.

**Table S2.** Rate constants for fluorescence quenching by iodide.

| $k_q / 10^9 \text{ (M}^{-1} \text{ s}^{-1}\text{)}$ |                                   |                                   |
|-----------------------------------------------------|-----------------------------------|-----------------------------------|
| [Dns or NPX derivative] / $\mu\text{M}$             | <i>3<math>\beta</math>-Dns-CA</i> | <i>3<math>\beta</math>-NPX-CA</i> |
| 16                                                  | 0.75                              | 3.10                              |
| 25                                                  | 0.74                              | --                                |
| 30                                                  | 0.72                              | 3.05                              |
| 40                                                  | 0.67                              | 2.42                              |
| 45                                                  | 0.54                              | --                                |
| 50                                                  | 0.37                              | 1.70                              |
| 60                                                  | 0.21                              | 0.87                              |
| 70                                                  | 0.17                              | 0.61                              |
| 80                                                  | 0.16                              | 0.52                              |
| 100                                                 | 0.15                              | 0.53                              |



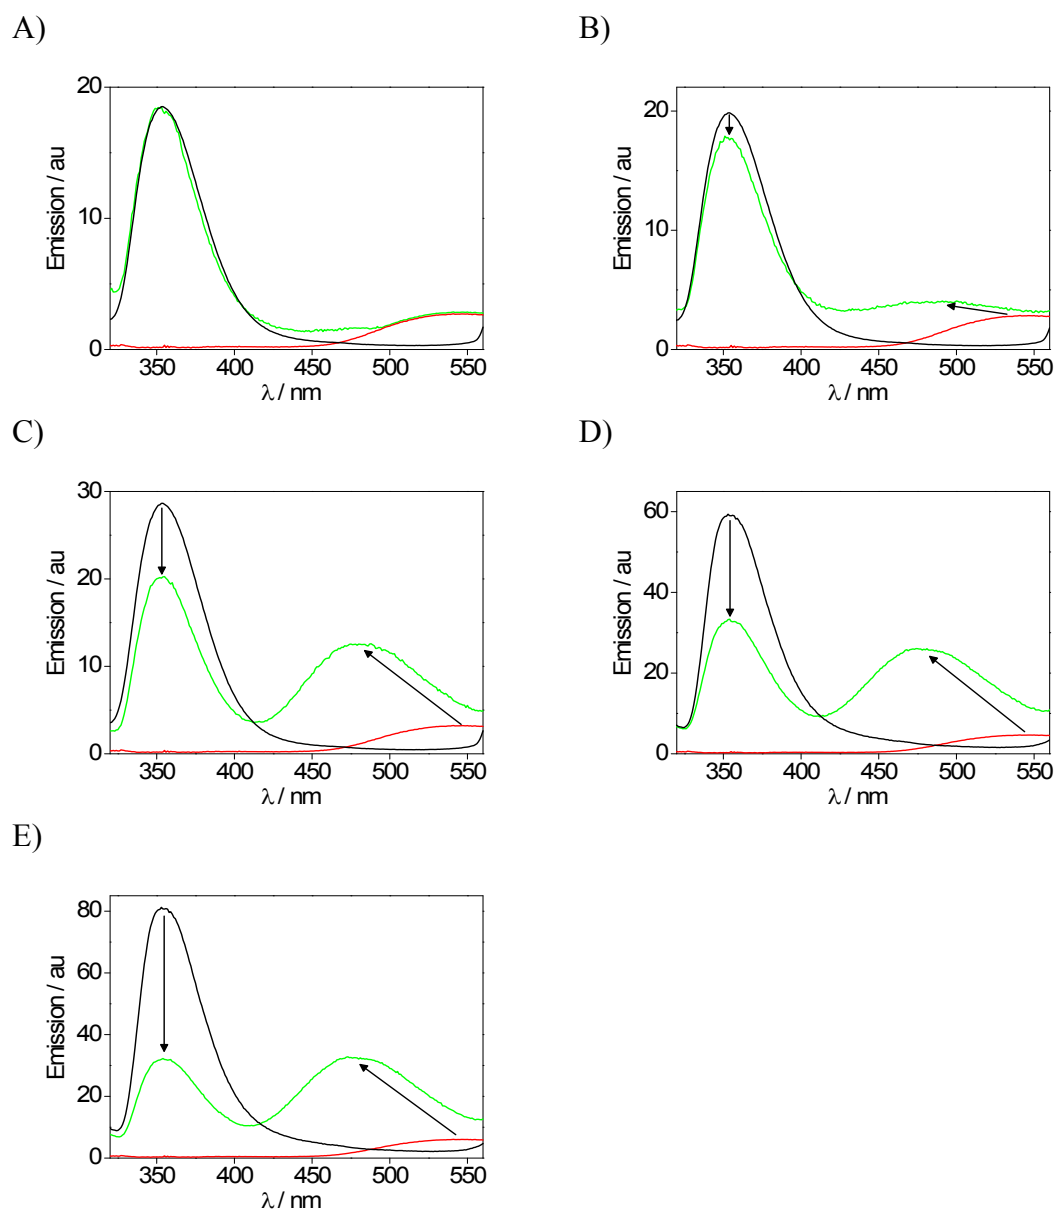

**Figure S6.** Emission spectra ( $\lambda_{\text{exc}} = 290 \text{ nm}$ ) of  $3\beta$ -Dns-CA (red),  $3\beta$ -NPX-CA (black) and 1:1 intermolecular mixtures (green) at different concentrations: A)  $1 \mu\text{M}$ ; B)  $2 \mu\text{M}$ ; C)  $6 \mu\text{M}$ ; D)  $20 \mu\text{M}$  and E)  $30 \mu\text{M}$ .

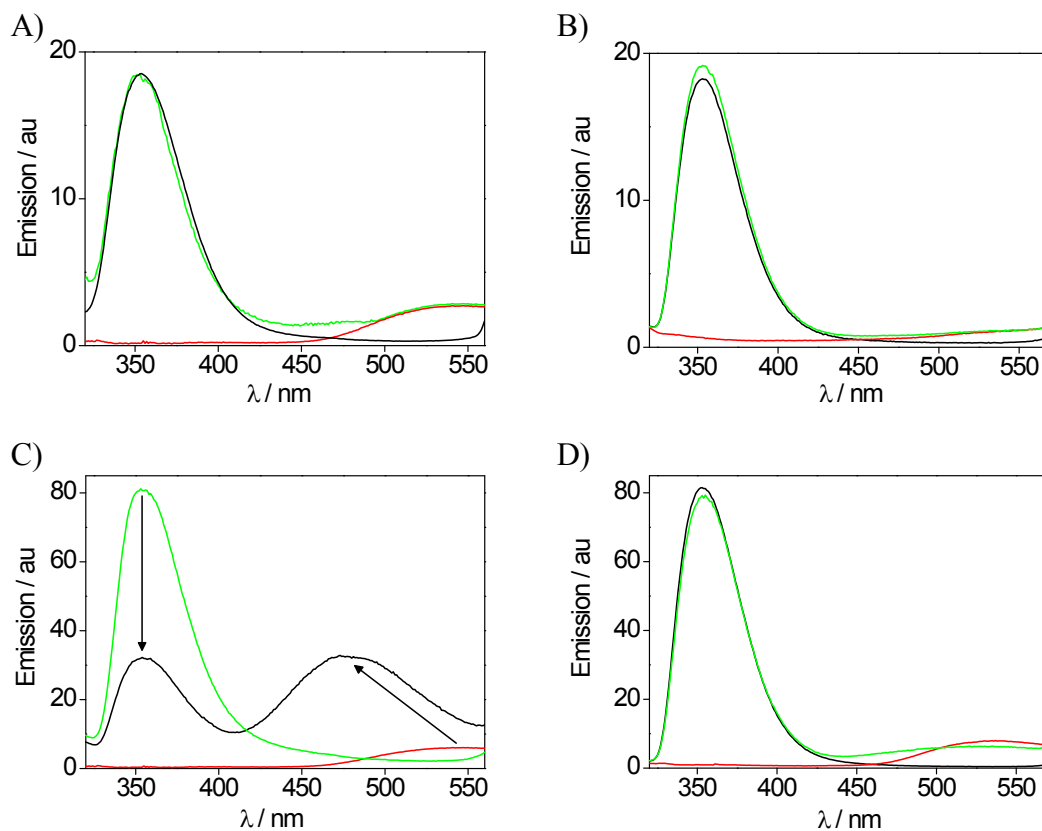

**Figure S7.** Emission spectra of A) 3 $\beta$ -Dns-CA (1  $\mu$ M, red), 3 $\beta$ -NPX-CA (1  $\mu$ M, black) and 1:1 intermolecular mixture (green); B) Chx-Dns (1  $\mu$ M, red), NPX (1  $\mu$ M, black) and 1:1 intermolecular mixture (green); C) 3 $\beta$ -Dns-CA (30  $\mu$ M, red), 3 $\beta$ -NPX-CA (30  $\mu$ M, black) and 1:1 intermolecular mixture (green); D) Chx-Dns (30  $\mu$ M, red), NPX (30  $\mu$ M, black) and 1:1 intermolecular mixture (green).
